# Supplementary material for: Modulating functional amyloid formation via alternative splicing of the premelanosomal protein PMEL17
Source: PubMed Central journal article supplement (PMC7247297; doi:10.1074/jbc.ra120.013012), 2020-04-10
Supplement: supp_RA120.013012_158788_3_supp_507260_q8fvd3.pdf [file supp_RA120.013012_158788_3_supp_507260_q8fvd3.pdf]

**Supporting Information for:**

**Modulating Functional Amyloid Formation via Alternative Splicing of Pmel17**

Dexter N. Dean and Jennifer C. Lee\*

The Laboratory of Protein Conformation and Dynamics, Biochemistry and Biophysics Center, National Heart, Lung, and Blood Institute, National Institutes of Health, Bethesda, MD 20892, USA

\*To whom correspondence should be addressed. Email: [leej4@nhlbi.nih.gov](mailto:leej4@nhlbi.nih.gov)

**Table S1.** Average  $t_{1/2}$  and  $\lambda_{\max}$  values determined for data in Figure 1

| pH | $t_{1/2}$ (h) |      | $\lambda_{\max}$ (nm) |      |
|----|---------------|------|-----------------------|------|
|    | IRPT          | sRPT | IRPT                  | sRPT |
| 5  | 35            | 0.5  | 334                   | 329  |
| 6  | 50            | 5.3  | 336                   | 338  |

\*For sRPT at pH 5, the initial increase in Trp fluorescence was used to determine the  $t_{1/2}$ .

**Table S2.** RPT fragments identified by LC-MS

| Fragment    | Theoretical Mass (Da) | Observed Mass (Da) |           |           |
|-------------|-----------------------|--------------------|-----------|-----------|
|             |                       | Unseeded IRPT      | IRPT/IRPT | IRPT/sRPT |
| Full-length | 13914.4               | 13914.6            | 13914.5   | 13914.6   |
| N'-442      | 12891.3               | 12891.4            | 12891.4   | 12891.4   |
| 332-C'      | 12247.6               | -                  | 12247.6   | 12247.6   |
| 332-442     | 11224.5               | -                  | 11224.7   | 11224.7   |
| 371-C'      | 8427.4                | 8427.6             | 8427.6    | 8427.6    |
| 373-C'      | 8239.2                | 8239.3             | 8239.4    | 8239      |
| 371-442     | 7404.3                | 7404.3             | 7404.6    | 7404.2    |
| 373-442     | 7216.1                | 7216               | 7216.1    | 7216      |
| 393-442     | 5126.6                | -                  | 5126.6    | 5126.6    |
|             |                       | Unseeded sRPT      | sRPT/sRPT | sRPT/IRPT |
| Full-length | 9694.5                | 9694.7             | 9694.7    | 9694.7    |
| N'-400      | 8671.4                | 8671.3             | 8671.4    | 8671.4    |
| 332-C'      | 8027.7                | 8027.8             | 8027.9    | 8027.8    |
| 332-400     | 7004.7                | 7004.8             | 7004.8    | 7004.8    |
| 332-398     | 6846.5                | 6846.7             | 6846.6    | 6846.7    |

**Table S3.** List of Pmel homologs having both long and short RPT isoforms

| species                       | gene accession number |                |
|-------------------------------|-----------------------|----------------|
|                               | long isoform          | short isoform  |
| human                         | NP_001186983.1        | NP_001307050.1 |
| water buffalo                 | XP_025139495.1        | XP_025139498.1 |
| great roundleaf bat           | XP_019524620.1        | XP_019524621.1 |
| sea otter                     | XP_022378685.1        | XP_022378684.1 |
| prairie vole                  | XP_005371224.1        | XP_026633811.1 |
| Bolivian squirrel monkey      | XP_010348249.1        | XP_010348250.1 |
| pale spear-nosed bat          | XP_028387979.1        | XP_028387981.1 |
| common vampire bat            | XP_024432074.1        | XP_024432077.1 |
| Philippine tarsier            | XP_008062211.1        | XP_021571200.1 |
| degu                          | XP_023563148.1        | XP_023563150.1 |
| chimpanzee                    | XP_009423447.2        | XP_009423449.2 |
| Yangtze River dolphin         | XP_007467815.1        | XP_007467816.1 |
| Arctic ground squirrel        | XP_026254104.1        | XP_026254106.1 |
| small-eared galago            | XP_012661050.1        | XP_023369387.1 |
| American beaver               | XP_020038469.1        | XP_020038472.1 |
| puma                          | XP_025782524.1        | XP_025782525.1 |
| Pacific white-sided dolphin   | XP_026962390.1        | XP_026962391.1 |
| long-finned pilot whale       | XP_030722545.1        | XP_030722546.1 |
| pygmy chimpanzee              | XP_008976891.1        | XP_008976893.1 |
| northern white-cheeked gibbon | XP_030678330.1        | XP_030678331.1 |

**Figure S1**

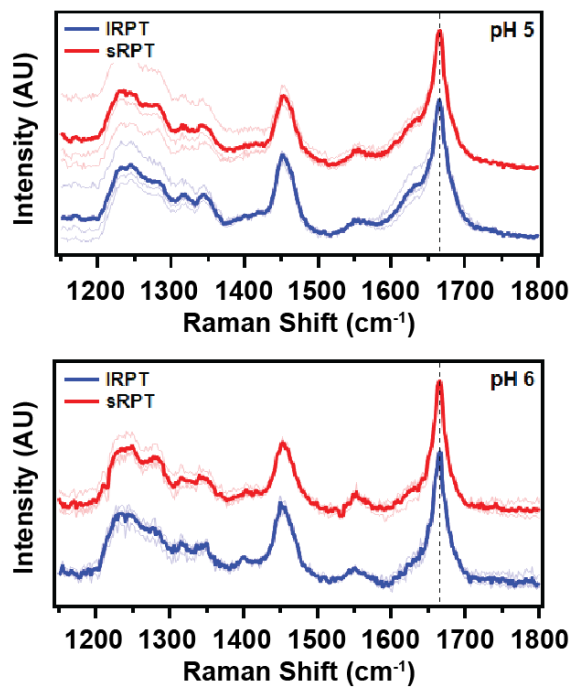

**Fig. S1.** IRPT and sRPT fibrils form similar,  $\beta$ -sheet-rich, secondary structure. IRPT (blue) and sRPT (red) fibrils were analyzed by Raman spectroscopy. Spectra were collected at multiple spatial locations (thin lines), which were then averaged (bold line). The vertical dashed line represents  $1665\text{ cm}^{-1}$ , to which data were normalized. sRPT spectra are off-set for clarity.

**Figure S2**

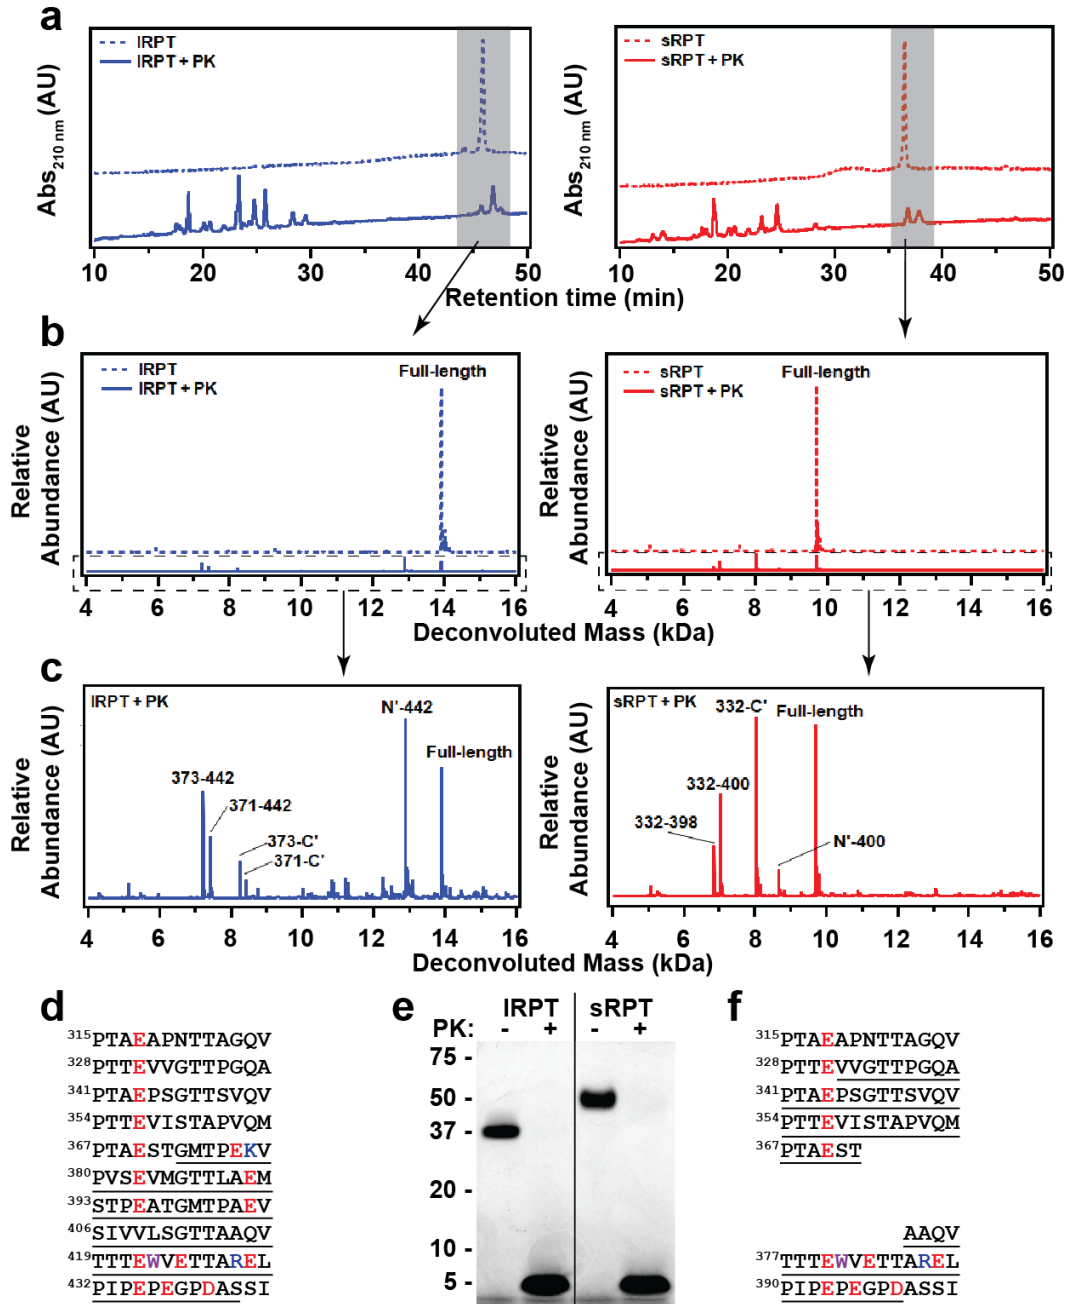

**Fig. S2.** Limited protease digestion of IRPT and sRPT. Unseeded IRPT (blue) or sRPT (red) fibrils (30  $\mu$ M, formed at pH 6) were incubated in the absence (dashed) or presence (solid) of 0.3  $\mu$ g/mL PK at 37  $^{\circ}$ C for 15 h and analyzed by LC-MS (a-c) and SDS-PAGE (e). Peaks corresponding to full-length/large peptides (shaded areas in a) were deconvoluted to identify the singly-charged masses (b-c). Fragments were mapped to the IRPT (d) or sRPT (f) sequence. The underlined regions represent the smallest protease-resistant fragment identified in (c). Data are representative of 2 independent experiments. The paradoxical migration of full-length IRPT at  $\sim$ 37 kDa and sRPT at  $\sim$ 50 kDa has been shown prior (McGlinchey et al. 2011 *J. Biol. Chem.*).

Figure S3

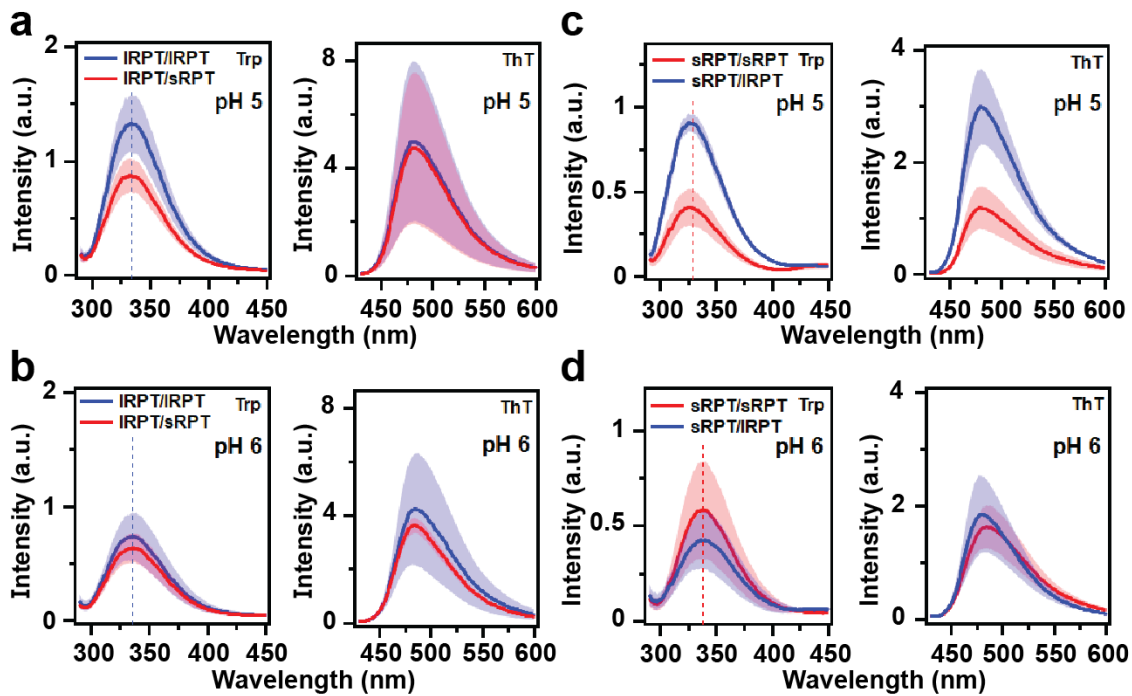

**Fig. S3.** Trp and ThT fluorescence of self- and cross-seeded RPT fibrils. IRPT (a–b) and sRPT (c–d) self- and cross-seeded fibrils, grown at pH 5 or 6, respectively. Spectra are normalized for respective concentration. Vertical dashed lines represent  $\lambda_{max}$  for unseeded IRPT (a–b) or sRPT (c–d) for comparison. Solid line and shaded area represent the mean and standard deviation, respectively, from 3 independent experiments.

Figure S4

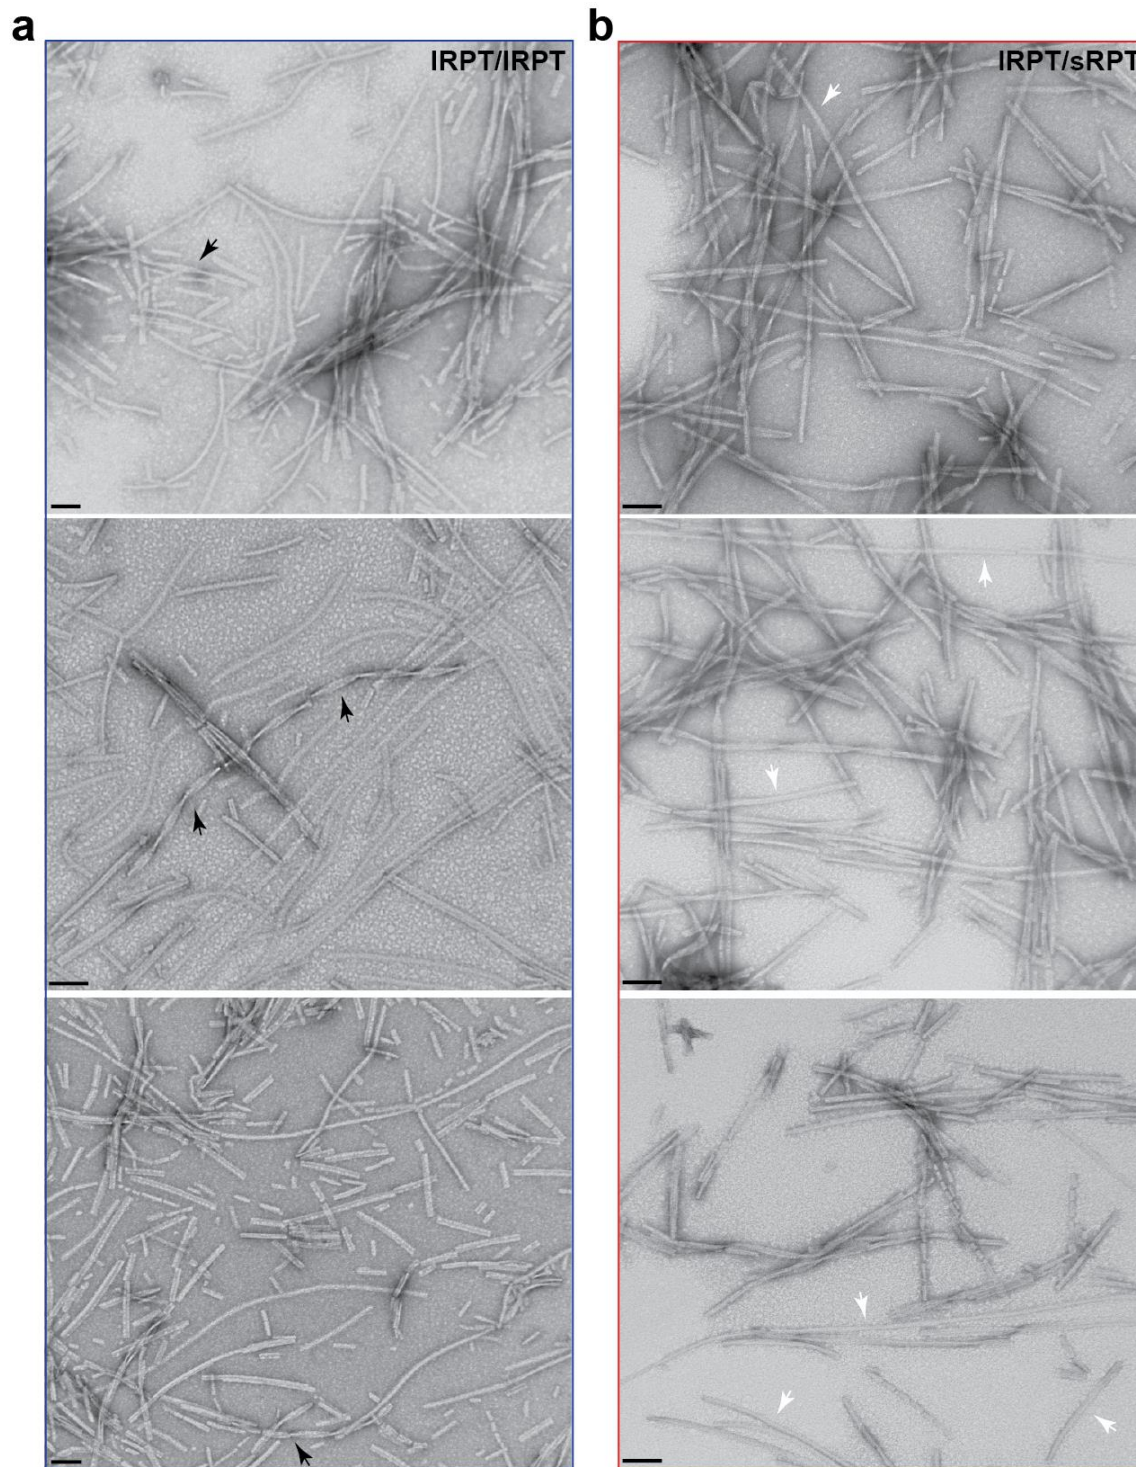

**Fig. S4.** Additional TEM images of IRPT/IRPT (a) and IRPT/sRPT (b) fibrils formed at pH 6. Black and white arrows represent twisted and straight filaments, respectively. Scale bars indicate 100 nm.

**Figure S5**

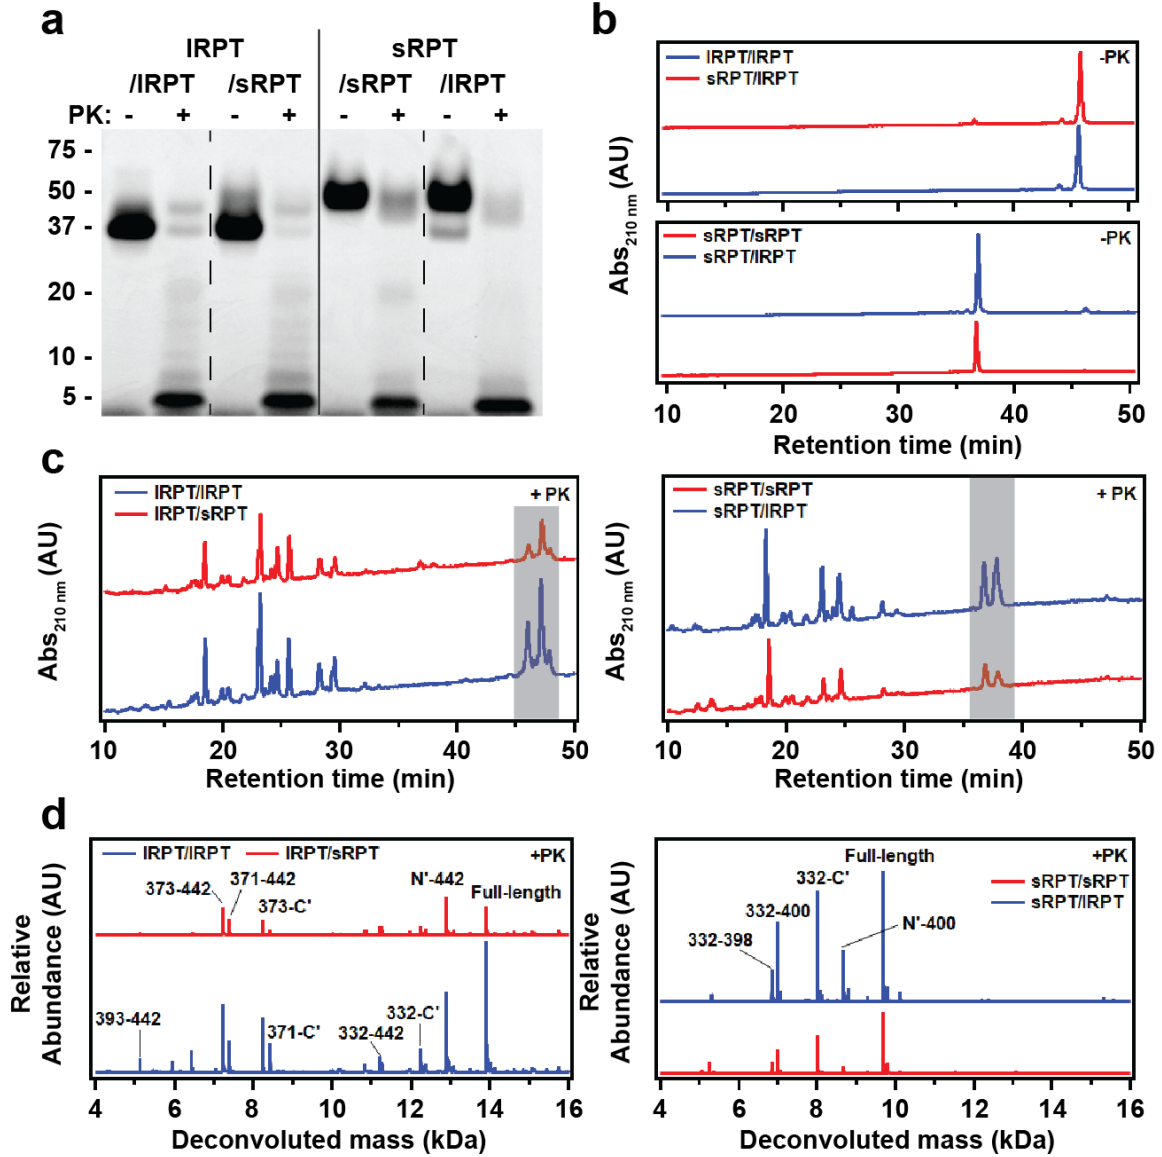

**Fig. S5.** Cross-seeding does not alter the protease-accessible regions of RPT at pH 6. Self- and cross-seeded fibrils (30  $\mu$ M, formed at pH 6), were incubated in the absence and presence of 0.3  $\mu$ g/mL PK at 37  $^{\circ}$ C for 8 h and analyzed by SDS-PAGE (a) and LC-MS (b-d). Peaks corresponding to full-length/large peptides (shaded areas in c) were deconvoluted to identify the singly-charged masses (d). Data are representative of 2 independent experiments.



**Figure S6**

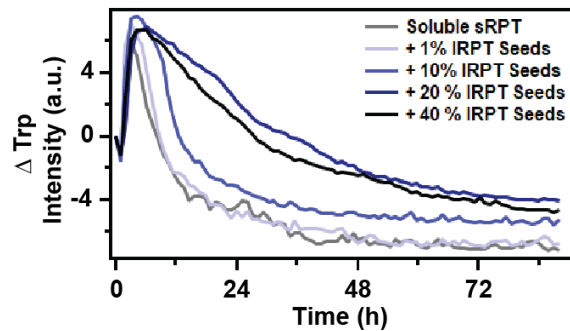

**Fig. S6.** IRPT fibrils inhibit the maturation phase of sRPT aggregation. The aggregation of 30  $\mu$ M sRPT alone (grey) and in the presence of 0.3 (1%, light blue), 3 (10%, blue), 6 (20%, dark blue) or 12  $\mu$ M (40%, black) IRPT seeds at pH 5. Reactions were monitored under constant shaking (6 mm) at 37  $^{\circ}$ C. Data represent an average of 4 replicates.

Figure S7

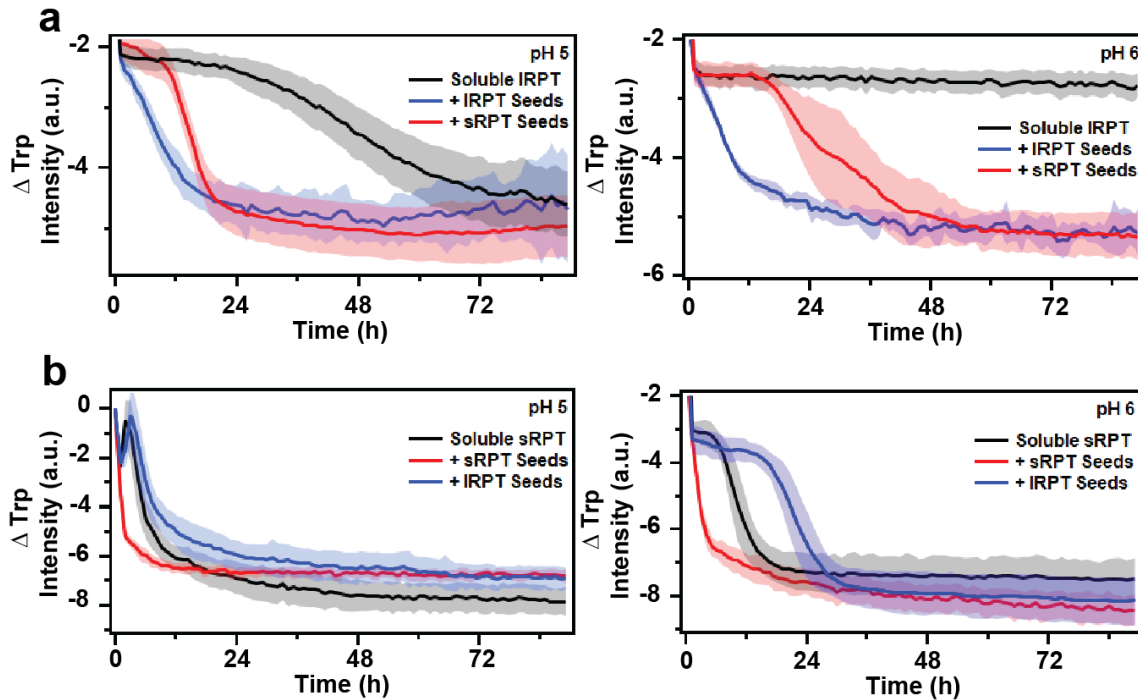

**Fig. S7.** Additional data set for self- and cross-seeding reactions. The aggregation of 30  $\mu$ M IRPT (a) or sRPT (b) alone (black) and in the presence of 3  $\mu$ M IRPT (blue) or sRPT (red) seeds at pH 5 and 6. Reactions were monitored under constant linear shaking (6 mm) at 37  $^{\circ}$ C. Solid line and shaded area represent the mean and standard deviation, respectively, from  $\geq 5$  replicates.

**Figure S8**

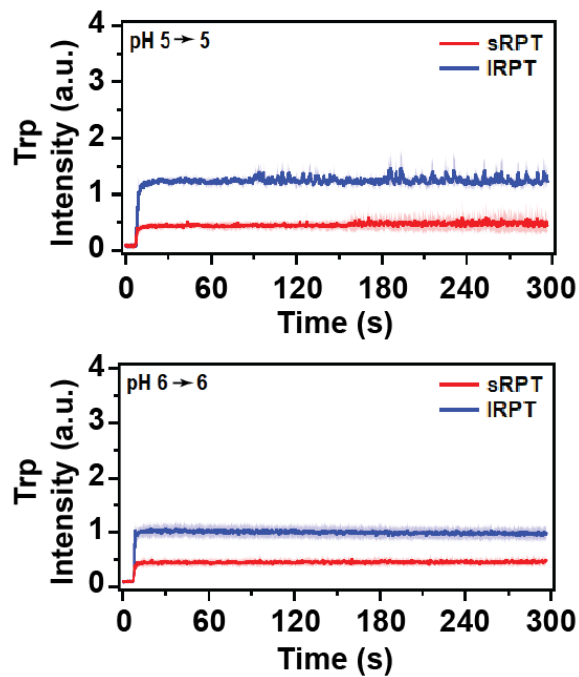

**Fig. S8.** Self-dilution does not result in disaggregation. IRPT (blue) and sRPT (red) fibrils ( $10 \mu\text{M}$ ), formed at pH 5 or 6 were diluted 6-fold into a cuvette containing pH 5 or 6 buffer and Trp emission was monitored under constant stirring at  $25 \text{ }^\circ\text{C}$ . The bold line and shaded area represent the mean and standard deviation from 3 independent experiments, respectively.

Figure S9

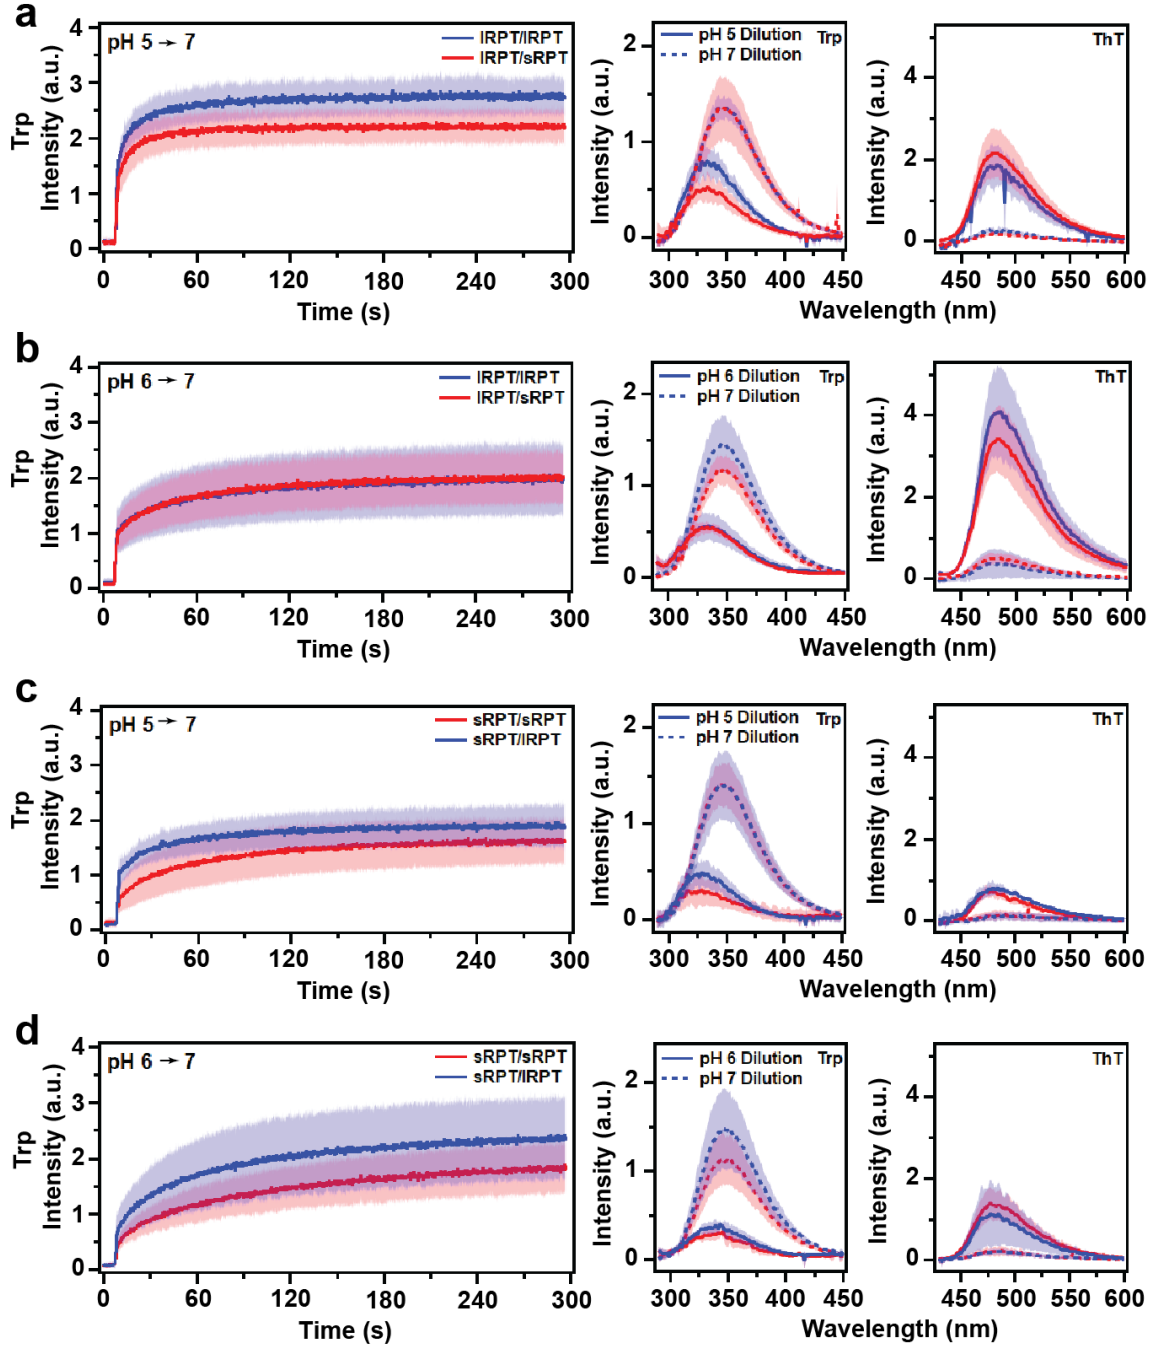

**Fig S9.** Disaggregation of self- and cross-seeded RPT fibrils. IRPT (a–b) and sRPT (c–d) self- and cross-seeded fibrils, grown at pH 5 or 6, were diluted 6-fold into pH 7 buffer and Trp emission was monitored under constant stirring at 25 °C. Trp and ThT fluorescence were collected after self-dilution (solid lines) or dilution into pH 7 buffer (dashed lines). Bold line and shaded area represent the mean and standard deviation from 3 independent experiments, respectively.
